# Supplementary material for: Are Gluten-Free Diets More Nutritious? An Evaluation of Self-Selected and Recommended Gluten-Free and Gluten-Containing Dietary Patterns
Source: MDPI journal article supplement (doi:10.3390/nu10121881), 2018-12-03
Supplement: s1 [file s1]

**Supplementary Table S1:** MyPlate seven-day gluten containing menus with gluten free modifications

| DAY 1            |                                                                                                                                                                           |                                                                                                                                                                             |
|------------------|---------------------------------------------------------------------------------------------------------------------------------------------------------------------------|-----------------------------------------------------------------------------------------------------------------------------------------------------------------------------|
|                  | Gluten Containing                                                                                                                                                         | Gluten Free                                                                                                                                                                 |
| <b>Breakfast</b> | uncooked oatmeal<br>fat-free milk<br>raisins<br>brown sugar<br>orange juice                                                                                               | uncooked oatmeal<br>fat-free milk<br>raisins<br>brown sugar<br>orange juice                                                                                                 |
| <b>Lunch</b>     | tortilla chips<br>cooked ground turkey<br>corn oil<br>kidney beans<br>low-fat cheddar cheese<br>chopped lettuce<br>avocado<br>lime juice<br>salsa<br>coffee               | tortilla chips<br>cooked ground turkey<br>corn oil<br>kidney beans<br>low-fat cheddar cheese<br>chopped lettuce<br>avocado<br>lime juice<br>salsa<br>coffee                 |
| <b>Dinner</b>    | dry lasagna noodles (two pieces)<br>cooked spinach<br>ricotta cheese<br>part-skim mozzarella cheese<br>tomato sauce<br>whole wheat roll<br>tub margarine<br>fat-free milk | gluten free rice pasta<br>cooked spinach<br>ricotta cheese<br>part-skim mozzarella cheese<br>tomato sauce<br>gluten-free multigrain rolls<br>tub margarine<br>fat-free milk |
| <b>Snacks</b>    | raisins<br>unsalted almonds                                                                                                                                               | raisins<br>unsalted almonds                                                                                                                                                 |

| DAY 2            |                                                                                                                                                 |                                                                                                                                                          |
|------------------|-------------------------------------------------------------------------------------------------------------------------------------------------|----------------------------------------------------------------------------------------------------------------------------------------------------------|
|                  | Gluten Containing                                                                                                                               | Gluten Free                                                                                                                                              |
| <b>Breakfast</b> | flour tortilla<br>scrambled egg<br>black beans<br>salsa<br>large grapefruit<br>tea                                                              | gluten-free plain tortilla<br>scrambled egg<br>black beans<br>salsa<br>large grapefruit<br>tea                                                           |
| <b>Lunch</b>     | small whole grain hoagie bun<br>lean roast beef<br>part-skim mozzarella cheese<br>tomato<br>mushrooms<br>canola oil<br>mustard<br>potato wedges | gluten free whole grain sandwich roll<br>lean roast beef<br>part-skim mozzarella cheese<br>tomato<br>mushrooms<br>canola oil<br>mustard<br>potato wedges |

|               |                                                                                                                             |                                                                                                                             |
|---------------|-----------------------------------------------------------------------------------------------------------------------------|-----------------------------------------------------------------------------------------------------------------------------|
|               | corn oil<br>ketchup<br>fat-free milk                                                                                        | corn oil<br>ketchup<br>fat-free milk                                                                                        |
| <b>Dinner</b> | salmon filet<br>olive oil<br>lemon juice<br>cooked beat greens<br>canola oil<br>quinoa<br>slivered almonds<br>fat-free milk | salmon filet<br>olive oil<br>lemon juice<br>cooked beat greens<br>canola oil<br>quinoa<br>slivered almonds<br>fat-free milk |
| <b>Snacks</b> | cantaloupe balls                                                                                                            | cantaloupe balls                                                                                                            |

| DAY 3            |                                                                                                                                                         |                                                                                                                                                                     |
|------------------|---------------------------------------------------------------------------------------------------------------------------------------------------------|---------------------------------------------------------------------------------------------------------------------------------------------------------------------|
|                  | Gluten Containing                                                                                                                                       | Gluten Free                                                                                                                                                         |
| <b>Breakfast</b> | medium banana<br>fat-free milk<br>whole wheat toast<br>tub margarine<br>Multigrain Cheerios<br>prune juice                                              | medium banana<br>fat-free milk<br>gluten-free 7-grain bread<br>tub margarine<br>gluten-free Cereal<br>prune juice                                                   |
| <b>Lunch</b>     | rye bread<br>tuna<br>mayonnaise<br>chopped celery<br>shredded lettuce<br>medium peach<br>fat-free milk                                                  | gluten-free whole grain rye style bread<br>tuna<br>mayonnaise<br>chopped celery<br>shredded lettuce<br>medium peach<br>fat-free milk                                |
| <b>Dinner</b>    | cooked chicken breast<br>large sweet potato, roasted<br>succotash (lima beans and corn)<br>tub margarine<br>whole wheat roll<br>tub margarine<br>coffee | cooked chicken breast<br>large sweet potato, roasted<br>succotash (lima beans and corn)<br>tub margarine<br>gluten-free multigrain rolls<br>tub margarine<br>coffee |
| <b>Snacks</b>    | dried apricots<br>flavored yogurt (chocolate)                                                                                                           | dried apricots<br>flavored yogurt (chocolate)                                                                                                                       |

| DAY 4 |                   |             |
|-------|-------------------|-------------|
|       | Gluten Containing | Gluten Free |

|                  |                                                                                                                                                                                                             |                                                                                                                                                                                                              |
|------------------|-------------------------------------------------------------------------------------------------------------------------------------------------------------------------------------------------------------|--------------------------------------------------------------------------------------------------------------------------------------------------------------------------------------------------------------|
| <b>Breakfast</b> | whole wheat english muffin<br>all-fruit preserves<br>hard-cooked egg<br>tea                                                                                                                                 | brown rice english muffin<br>all-fruit preserves<br>hard-cooked egg<br>tea                                                                                                                                   |
| <b>Lunch</b>     | chunky vegetable soup with pasta<br>white beans<br>saltine crackers<br>celery sticks<br>fat-free milk                                                                                                       | gluten-free veggie noodle soup<br>white beans<br>gluten-free table crackers<br>celery sticks<br>fat-free milk                                                                                                |
| <b>Dinner</b>    | dry rigatoni pasta<br>cooked ground beef (95% lean)<br>corn oil<br>tomato sauce<br>grated parmesan cheese<br>raw spinach leaves<br>tangerine sections<br>chopped walnuts<br>oil and vinegar dressing<br>tea | gluten-free fusilli<br>cooked ground beef (95% lean)<br>corn oil<br>tomato sauce<br>grated parmesan cheese<br>raw spinach leaves<br>tangerine sections<br>chopped walnuts<br>oil and vinegar dressing<br>tea |
| <b>Snacks</b>    | nonfat fruit yogurt                                                                                                                                                                                         | nonfat fruit yogurt                                                                                                                                                                                          |

| DAY 5            |                                                                                                                                           |                                                                                                                                                       |
|------------------|-------------------------------------------------------------------------------------------------------------------------------------------|-------------------------------------------------------------------------------------------------------------------------------------------------------|
|                  | Gluten Containing                                                                                                                         | Gluten Free                                                                                                                                           |
| <b>Breakfast</b> | shredded wheat<br>sliced banana<br>fat-free milk<br>whole wheat toast<br>all-fruit preserves<br>fat-free chocolate milk                   | shredded wheat<br>sliced banana<br>fat-free milk<br>gluten-free 7-grain bread<br>all-fruit preserves<br>fat-free chocolate milk                       |
| <b>Lunch</b>     | whole wheat pita bread<br>roasted turkey<br>tomato<br>shredded lettuce<br>mustard<br>mayonnaise<br>grapes<br>tomato juice                 | gluten-free, wheat-free wraps ivory teff<br>roasted turkey<br>tomato<br>shredded lettuce<br>mustard<br>mayonnaise<br>grapes<br>tomato juice           |
| <b>Dinner</b>    | broiled beef steak<br>mashed potatoes made with milk<br>tub margarine<br>cooked green beans<br>tub margarine<br>honey<br>whole wheat roll | broiled beef steak<br>mashed potatoes made with milk<br>tub margarine<br>cooked green beans<br>tub margarine<br>honey<br>gluten-free multigrain rolls |

|               |                                                                                    |                                                                                    |
|---------------|------------------------------------------------------------------------------------|------------------------------------------------------------------------------------|
|               | tub margarine<br>frozen yogurt (chocolate)<br>sliced strawberries<br>fat-free milk | tub margarine<br>frozen yogurt (chocolate)<br>sliced strawberries<br>fat-free milk |
| <b>Snacks</b> | frozen yogurt (chocolate)                                                          | frozen yogurt (chocolate)                                                          |

| DAY 6            |                                                                                                                                                                                           |                                                                                                                                                                                           |
|------------------|-------------------------------------------------------------------------------------------------------------------------------------------------------------------------------------------|-------------------------------------------------------------------------------------------------------------------------------------------------------------------------------------------|
|                  | Gluten Containing                                                                                                                                                                         | Gluten Free                                                                                                                                                                               |
| <b>Breakfast</b> | whole wheat bread<br>fat-free milk<br>egg<br>tub margarine<br>pancake syrup<br>large grapefruit<br>fat-free milk                                                                          | gluten-free mountain white bread<br>fat-free milk<br>egg<br>tub margarine<br>pancake syrup<br>large grapefruit<br>fat-free milk                                                           |
| <b>Lunch</b>     | cooked kidney beans<br>navy beans<br>black beans<br>tomato sauce<br>chopped onion<br>chopped jalapeno peppers<br>canola oil<br>cheese sauce<br>large baked potato<br>cantaloupe<br>coffee | cooked kidney beans<br>navy beans<br>black beans<br>tomato sauce<br>chopped onion<br>chopped jalapeno peppers<br>canola oil<br>cheese sauce<br>large baked potato<br>cantaloupe<br>coffee |
| <b>Dinner</b>    | cheese pizza, thin crust<br>lean ham<br>pineapple<br>mushrooms<br>safflower oil<br>romaine<br>spinach<br>oil and vinegar dressing<br>fat-free milk                                        | three cheese pizza (half a pizza)<br>lean ham<br>pineapple<br>mushrooms<br>safflower oil<br>romaine<br>spinach<br>oil and vinegar dressing<br>fat-free milk                               |
| <b>Snacks</b>    | hummus<br>whole wheat crackers                                                                                                                                                            | hummus<br>gluten-free multigrain crackers                                                                                                                                                 |

| DAY 7            |                                                                                       |                                                                                       |
|------------------|---------------------------------------------------------------------------------------|---------------------------------------------------------------------------------------|
|                  | Gluten Containing                                                                     | Gluten Free                                                                           |
| <b>Breakfast</b> | large (7") buckwheat pancakes<br>pancake syrup<br>sliced strawberries<br>orange juice | large (7") buckwheat pancakes<br>pancake syrup<br>sliced strawberries<br>orange juice |

|               |                                                                                                                                                                                                             |                                                                                                                                                                                                             |
|---------------|-------------------------------------------------------------------------------------------------------------------------------------------------------------------------------------------------------------|-------------------------------------------------------------------------------------------------------------------------------------------------------------------------------------------------------------|
| <b>Lunch</b>  | canned clams<br>small potato<br>chopped onion<br>chopped celery<br>evaporated milk<br>fat-free milk<br>bacon<br>white flour<br>whole wheat crackers<br>medium orange<br>fat-free milk                       | canned clams<br>small potato<br>chopped onion<br>chopped celery<br>evaporated milk<br>fat-free milk<br>bacon<br>white rice flour<br>gluten-free multigrain crackers<br>medium orange<br>fat-free milk       |
| <b>Dinner</b> | firm tofu<br>chopped chinese cabbage<br>sliced bamboo shoots<br>chopped sweet red peppers<br>chopped sweet green peppers<br>corn oil<br>cooked brown rice<br>honeydew melon<br>plain fat-free yogurt<br>tea | firm tofu<br>chopped chinese cabbage<br>sliced bamboo shoots<br>chopped sweet red peppers<br>chopped sweet green peppers<br>corn oil<br>cooked brown rice<br>honeydew melon<br>plain fat-free yogurt<br>tea |
| <b>Snacks</b> | large banana<br>peanut butter<br>nonfat fruit yogurt                                                                                                                                                        | large banana<br>peanut butter<br>nonfat fruit yogurt                                                                                                                                                        |
